# Supplementary material
Source: HighWire-hosted journal article supplement (https://jpet.aspetjournals.org/highwire/filestream/150811/field_highwire_adjunct_files/0/743SupplTables.pdf)
Supplement: 743SupplTables.pdf [file 743SupplTables.pdf]

**SUPPLEMENTAL DATA**

**Etavopivat, a Pyruvate Kinase Activator in Red Blood Cells, for the Treatment of Sickle Cell Disease**

Patricia Schroeder,<sup>1</sup> Keertik Fulzele,<sup>1</sup> Sanjeev Forsyth, Maria D. Ribadeneira, Sylvie Guichard, Erik Wilker, C. Gary Marshall, Adam Drake, Rose Fessler, Diamantis G. Konstantinidis, Katie G. Seu, and Theodosia A. Kalfa

*<sup>1</sup>Co first authors*

**Journal of Pharmacology and Experimental Therapeutics**

JPET-AR-2021-000743

**Text S1.** 2,3-DPG PK/PD modeling

NHP PK and 2,3-DPG data were modeled using a simultaneous PK/PD approach utilizing Phoenix<sup>®</sup> NLME software (Certara, Princeton, NJ). The PK data were fit using a two-compartment model with first-order absorption. The 2,3-DPG data were fit using a basic indirect-response model (Dayneka et al., 1993; Sharma and Jusko, 1998) with a stimulation of loss function for 2,3-DPG shown in equation 1, where  $2,3DPG_0$  is baseline 2,3-DPG levels,  $K_{out}$  is a first-order loss rate constant,  $S_{max}$  is the maximum ability of etavopivat to affect  $K_{out}$ , and  $SC_{50}$  is the etavopivat concentration resulting in 50% of the maximum stimulation achieved at the effect site.

$$\frac{d2,3DPG}{dt} = 2,3DPG_0 \cdot K_{out} - K_{out} \cdot \left(1 + \frac{S_{max} \cdot C}{C + SC_{50}}\right) \cdot 2,3DPG$$

The maximum 2,3-DPG suppression ( $2,3DPG_{max}$ ) was estimated from equation 2.

$$2,3DPG_{max} = \left(\frac{2,3DPG_0}{1 + S_{max}}\right)$$

Half of the maximal 2,3-DPG response ( $2,3DPG_{50}$ ) was estimated from equation 3

$$2,3DPG_{50} = 2,3DPG_0 - \frac{2,3DPG_0 - 2,3DPG_{max}}{2}$$

The plasma concentration resulting in half of the maximum decrease in 2,3-DPG ( $EC_{50}$ ) was calculated using equation 4.

$$EC_{50} = \frac{SC_{50} \cdot (2,3DPG_0 - 2,3DPG_{50})}{2,3DPG_{50} \cdot (1 + S_{max}) - 2,3DPG_0}$$

**Table S1.** Etavopivat primary PK/PD parameters in non-human primates

| Parameter                           | Value | S.D.  |
|-------------------------------------|-------|-------|
| 2,3DPG <sub>0</sub> (μg/mL)         | 841   | 9.79  |
| K <sub>out</sub> (h <sup>-1</sup> ) | 0.100 | 0.019 |
| S <sub>max</sub>                    | 0.870 | 0.159 |
| SC <sub>50</sub> (ng/mL)            | 33.5  | 12.9  |

2,3DPG<sub>0</sub>, baseline 2,3-DPG levels; K<sub>out</sub>, first-order loss rate constant; PD, pharmacodynamic; PK, pharmacokinetic; S<sub>max</sub>, maximum ability of etavopivat to affect K<sub>out</sub>; SC<sub>50</sub>, etavopivat concentration resulting in 50% of the maximum stimulation achieved at the effect site; S.D, standard deviation.

**Table S2.** Etavopivat exposure in non-human primates after single and repeated escalating doses

| Etavopivat mean (S.D.) PK parameters (oral dosing) |                             |                                  |                             |                                  |
|----------------------------------------------------|-----------------------------|----------------------------------|-----------------------------|----------------------------------|
| Dose (mg/kg)                                       | Day 1                       |                                  | Day 5                       |                                  |
|                                                    | C <sub>max</sub><br>(ng/ml) | AUC <sub>0-24</sub><br>(h·ng/ml) | C <sub>max</sub><br>(ng/ml) | AUC <sub>0-24</sub><br>(h·ng/ml) |
| 3                                                  | 94 (44)                     | 608 (292)                        | 83 (45)                     | 295 (52)                         |
| 8                                                  | 352 (95)                    | 1116 (163)                       | 725 (198)                   | 1274 (86)                        |
| 22                                                 | 424 (320)                   | 1728 (658)                       | 689 (200)                   | 2568 (803)                       |
| 50                                                 | 1823 (489)                  | 8877 (1749)                      | ND                          | ND                               |

*n* = 4 animals per dose

AUC<sub>0-24</sub>, area under the concentration time curve from time 0–24 hours after dosing; C<sub>max</sub>, maximum plasma concentration; ND, not determined; PK, pharmacokinetic; S.D, standard deviation.

**Table S3.** Change in P<sub>50</sub> following etavopivat treatment in healthy subjects and ex vivo RBC from donors with SCD

|                                                         | <b>P<sub>50</sub> Pre-dose<br/>(mmHg)</b>                       | <b>P<sub>50</sub> 24 hours post-<br/>dose (mmHg)</b>        | <b>Change in P<sub>50</sub><br/>(mmHg)</b> |
|---------------------------------------------------------|-----------------------------------------------------------------|-------------------------------------------------------------|--------------------------------------------|
| <b>Healthy subjects: single 700-mg dose<br/>(n = 6)</b> | 26.5 (1.53)                                                     | 21.6 (2.05)                                                 | 4.85 (0.68)                                |
|                                                         | <b>P<sub>50</sub> - vehicle<br/>(DMSO) Treatment<br/>(mmHg)</b> | <b>P<sub>50</sub> - etavopivat<br/>Treatment<br/>(mmHg)</b> | <b>Change in P<sub>50</sub><br/>(mmHg)</b> |
| <b>Ex vivo SCD RBC (HbSC disease)<br/>(n = 6)</b>       | 26.3 (1.24)                                                     | 24.8 (1.58)                                                 | 1.47 (0.63)                                |
| <b>Ex vivo SCD RBC (HbSS disease)<br/>(n = 13)</b>      | 26.1 (1.99)                                                     | 24.8 (1.82)                                                 | 1.27 (0.76)                                |

Data are mean (S.D.)

DMSO, dimethyl sulfoxide; P<sub>50</sub>, the partial pressure of dissolved oxygen at which Hb is 50% saturated with oxygen; RBC, red blood cell; SCD, sickle cell disease; S.D., standard deviation.
